# Supplementary material for: The effect of different thawing methods on the health-promoting compounds and antioxidant capacity in frozen baby mustard
Source: Royal Society of Chemistry journal article supplement (doi:10.1039/d1ra00610j), 2021-01-01
Supplement: d1ra00610j1.pdf [file d1ra00610j1.pdf]

## **The effect of different thawing methods on the health-promoting compounds and antioxidant capacity in frozen baby mustard**

Fen Zhang,<sup>‡a</sup> Pei-Xing Lin,<sup>‡a</sup> Ping-Xin Xia,<sup>‡a</sup> Hong-Mei Di,<sup>a</sup> Jia-Qi Zhang,<sup>a</sup> Zi-Han Wang,<sup>a</sup> Zhi-Qing Li,<sup>a</sup> Shu-Ya Huang,<sup>a</sup> Huan-Xiu Li <sup>\*b</sup> and Bo Sun <sup>\*a</sup>

*<sup>a</sup>College of Horticulture, Sichuan Agricultural University, Chengdu 611130, China.*

*E-Mail: [bsun@sicau.edu.cn](mailto:bsun@sicau.edu.cn)*

*<sup>b</sup>Institute of Pomology and Olericulture, Sichuan Agricultural University, Chengdu 611130, China. E-Mail: [10650@sicau.edu.cn](mailto:10650@sicau.edu.cn)*

<sup>‡</sup> These authors contributed equally to this work.

Supplementary figure 1

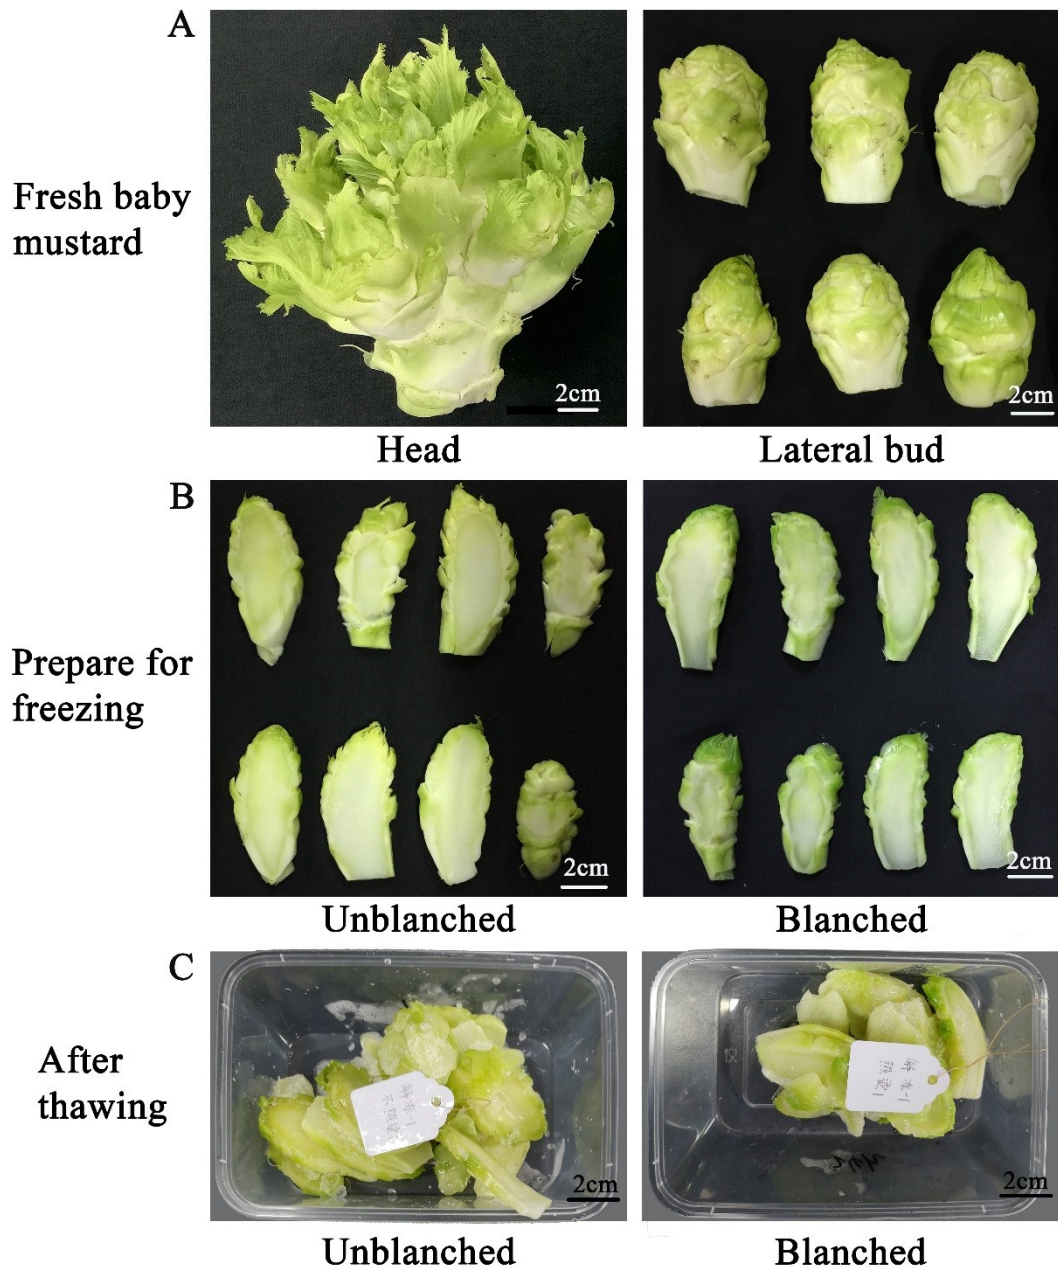

Supplementary Fig. 1 Baby mustard in this study. (A) Baby mustard in its fresh form; (B) Baby mustard as prepared for freezing; (C) Baby mustard after thawing processes.

## Supplementary figure 2

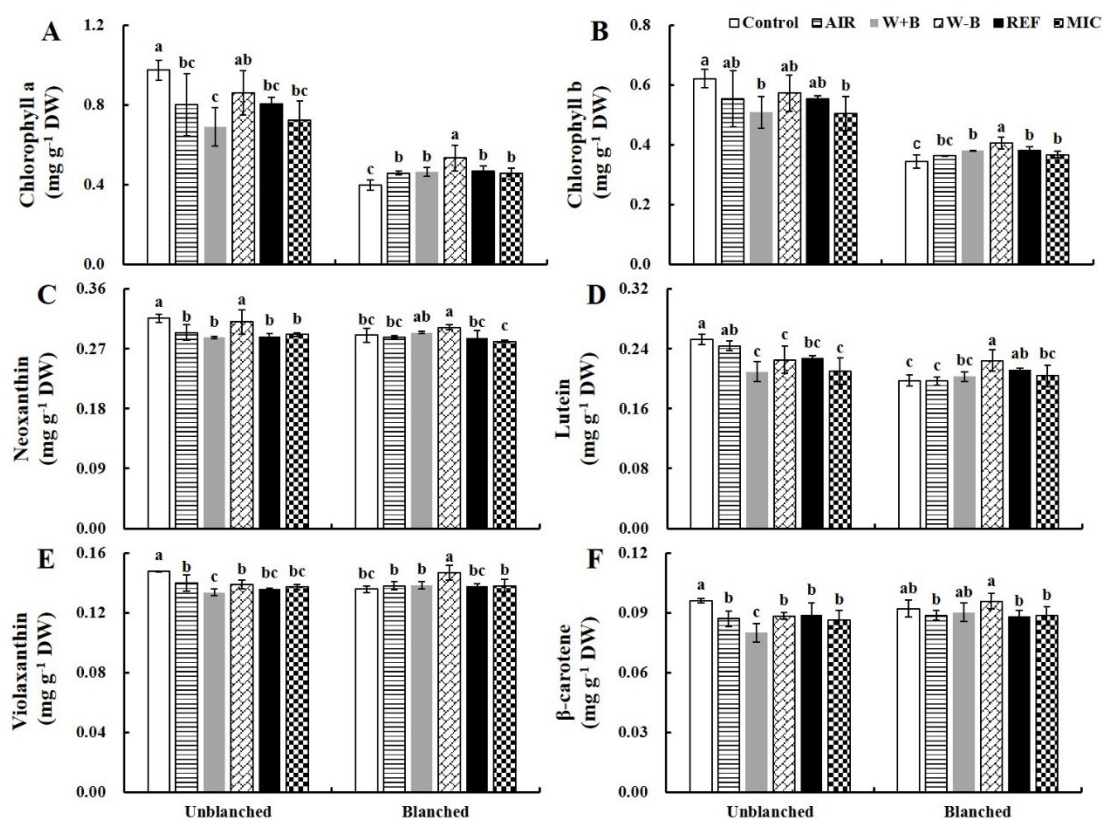

Supplementary Fig. 2 Effect of different thawing methods on the contents of chlorophyll a (A), chlorophyll b (B), neoxanthin (C), lutein (D), violaxanthin (E), and  $\beta$ -carotene (F) in frozen baby mustard. Each value is the mean  $\pm$  standard error of four replicates ( $n = 4$ ). Values not sharing a common letter are significantly different at  $p < 0.05$ . DW: dry weight.
